# Supplementary material for: A Freeze-Dried Cranberry Powder Consistently Enhances SCFA Production and Lowers Abundance of Opportunistic Pathogens In Vitro
Source: MDPI journal article supplement (doi:10.3390/biotech11020014), 2022-05-06
Supplement: s1 [file s1]

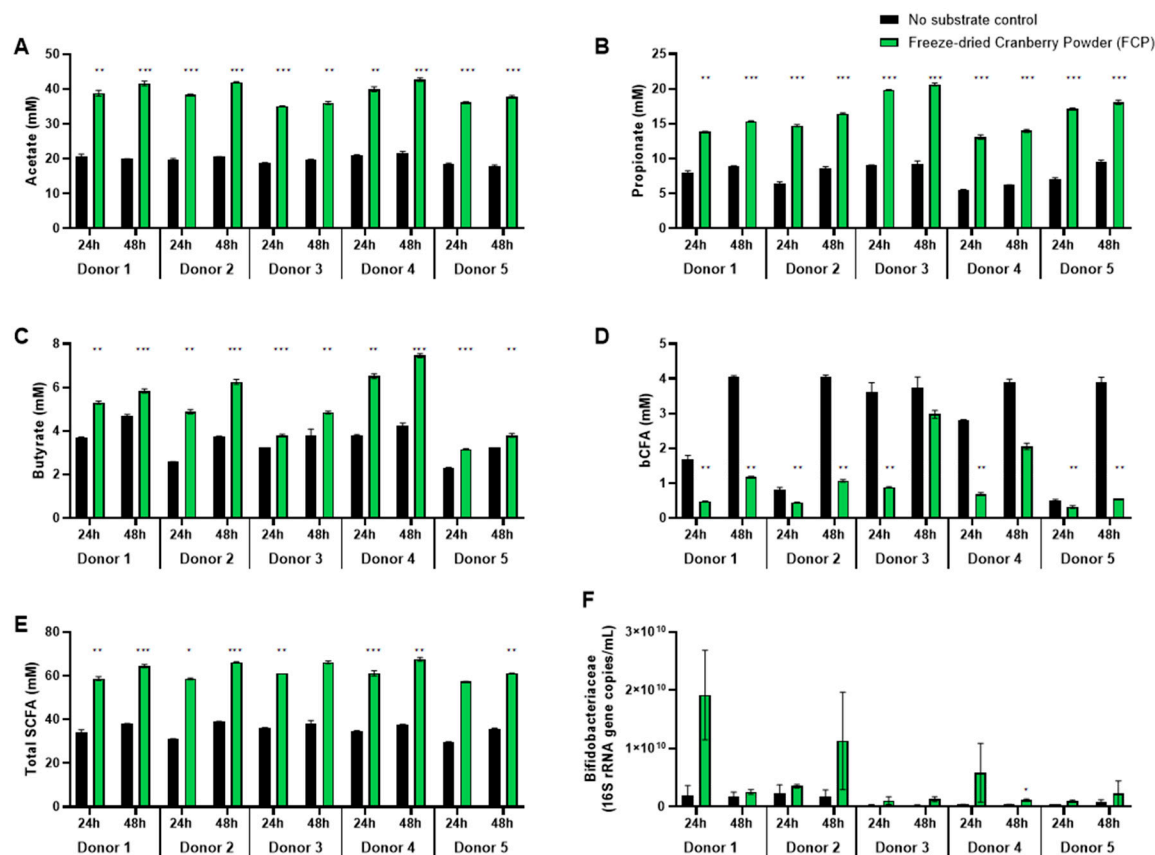

**Figure S1.** Effect of FCP on average ( $\pm$  SD) levels of acetate (A), propionate (B), butyrate (C), bCFA (D), total SCFA (E) and *Bifidobacteriaceae* (F), upon incubation with human faecal microbiota derived from 5 different human donors. All conditions were tested in technical duplicate. The data is presented as the average ( $\pm$  SD) for each of the different test conditions ( $n = 2$ ). Statistical differences due to treatment were indicated by \*/\*\*/\*\* (0.01 < adjusted p-value < 0.05/0.001 < adjusted p-value < 0.01/ adjusted p-value < 0.001).

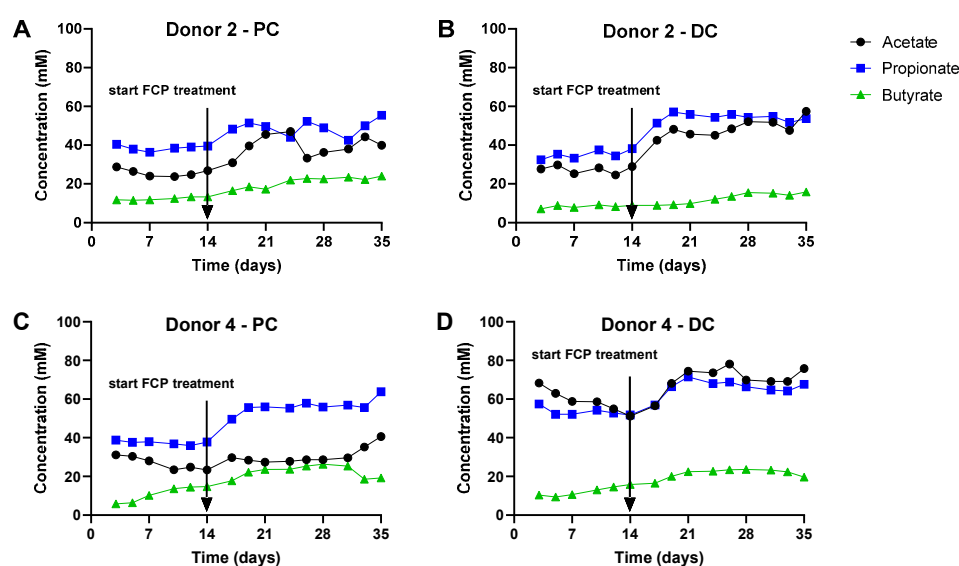

**Figure S2.** Effect of fermentation of FCP on SCFA levels (mM) in the simulated proximal colon (A/C) and distal colon (B/D) during both the control (Days 0–14) and treatment period (Days 14–35) of the triple-M-SHIME for donors 2 (A/B) and 4 (C/D). Arrows indicate the start of the FCP treatment.

**Table S1.** Effect of FCP on microbial composition (families belonging to specific phyla) in the simulated mucus (as estimated via 16S rRNA gene profiling (%)) of the simulated proximal and distal colon of the triple-M-SHIME. The data is presented as the difference between the value obtained at the end of the treatment period (TR: Day 35) and the end of the control period (C: Day 14) (n = 1). An increase (indicated in bold when > 2 %) thus reflects a stimulation of a given family by repeated FCP treatment, while a decrease (indicated by underlining when < -2 %) suggests a decrease due to FCP treatment.

| Phylum          | Family                    | Proximal colon |               |               | Distal colon  |               |               |
|-----------------|---------------------------|----------------|---------------|---------------|---------------|---------------|---------------|
|                 |                           | Donor 2        | Donor 3       | Donor 4       | Donor 2       | Donor 3       | Donor 4       |
| Actinobacteria  | Bifidobacteriaceae        | <u>-13.1%</u>  | 0.0%          | <u>-34.8%</u> | <b>6.1%</b>   | 0.4%          | <b>4.6%</b>   |
|                 | Coriobacteriaceae         | 0.1%           | 0.8%          | 0.0%          | <b>2.6%</b>   | 0.2%          | <b>2.5%</b>   |
| Bacteroidetes   | Bacteroidaceae            | <b>22.4%</b>   | <b>6.1%</b>   | 0.6%          | 1.5%          | <u>-7.4%</u>  | <u>-7.8%</u>  |
|                 | Bacteroidales_S24-7_group | 0.0%           | 0.0%          | 0.0%          | 0.0%          | <b>4.9%</b>   | 2.0%          |
|                 | Porphyromonadaceae        | 0.0%           | 0.4%          | 0.0%          | 1.3%          | <u>-2.2%</u>  | 0.1%          |
|                 | Prevotellaceae            | 0.0%           | <b>5.3%</b>   | <b>16.7%</b>  | 0.0%          | <b>2.4%</b>   | <b>3.3%</b>   |
|                 | Rikenellaceae             | 0.0%           | 0.1%          | 0.0%          | -0.5%         | 0.1%          | 0.4%          |
| Firmicutes      | Acidaminococcaceae        | <b>9.4%</b>    | -1.7%         | <b>10.5%</b>  | <b>4.2%</b>   | <b>3.6%</b>   | <b>2.3%</b>   |
|                 | Christensenellaceae       | 0.0%           | 0.0%          | 0.0%          | 0.0%          | 0.0%          | 0.1%          |
|                 | Clostridiaceae_1          | -0.4%          | -0.3%         | -0.4%         | -0.4%         | 0.6%          | -0.7%         |
|                 | Erysipelotrichaceae       | 0.0%           | 0.0%          | 0.0%          | 0.4%          | 0.4%          | <b>3.6%</b>   |
|                 | Eubacteriaceae            | 0.0%           | 0.0%          | 0.0%          | -0.8%         | <b>2.1%</b>   | 0.3%          |
|                 | Lachnospiraceae           | <u>-20.2%</u>  | <b>3.4%</b>   | 1.5%          | <b>7.5%</b>   | <b>7.6%</b>   | <u>-3.3%</u>  |
|                 | Ruminococcaceae           | 0.0%           | 0.0%          | 0.0%          | 0.2%          | 0.9%          | 1.5%          |
| Proteobacteria  | Veillonellaceae           | <b>6.8%</b>    | <u>-11.3%</u> | <b>2.3%</b>   | -0.5%         | -0.5%         | 1.2%          |
|                 | Victivallaceae            | 0.0%           | 0.0%          | 0.0%          | -0.1%         | 0.3%          | 0.8%          |
|                 | Alcaligenaceae            | 0.0%           | -0.2%         | 0.5%          | 0.0%          | 0.3%          | 0.3%          |
|                 | Campylobacteraceae        | -0.4%          | 0.0%          | 0.0%          | 0.0%          | 0.0%          | 0.0%          |
|                 | Desulfovibrionaceae       | 0.0%           | 0.7%          | 0.0%          | -1.2%         | -0.9%         | -1.8%         |
|                 | Enterobacteriaceae        | <u>-3.9%</u>   | -1.6%         | <b>4.2%</b>   | 0.1%          | 0.5%          | -0.2%         |
|                 | Pseudomonadaceae          | -0.7%          | <u>-2.2%</u>  | -0.5%         | 0.8%          | -0.1%         | -0.1%         |
| Synergistetes   | Rhodospirillaceae         | 0.0%           | 0.1%          | 0.0%          | 0.3%          | 0.2%          | 1.5%          |
|                 | Xanthomonadaceae          | -0.4%          | -0.1%         | -0.6%         | 0.0%          | 0.0%          | -0.1%         |
| Synergistetes   | Synergistaceae            | 0.0%           | 0.3%          | 0.0%          | <u>-21.0%</u> | <u>-12.8%</u> | <u>-11.4%</u> |
| Verrucomicrobia | Verrucomicrobiaceae       | 0.0%           | 0.0%          | 0.0%          | -0.1%         | -0.4%         | 0.9%          |

**Table S2.** Microbial composition (families belonging to specific phyla) in the lumen (as estimated via 16S rRNA gene profiling (%)) of the simulated proximal and distal colon of the triple-M-SHIME during the control period (Day 14) (n = 1).

| Phylum         | Family                    | Proximal colon |         |         | Distal colon |         |         |
|----------------|---------------------------|----------------|---------|---------|--------------|---------|---------|
|                |                           | Donor 2        | Donor 3 | Donor 4 | Donor 2      | Donor 3 | Donor 4 |
| Actinobacteria | Bifidobacteriaceae        | 22.5%          | 2.0%    | 1.8%    | 0.4%         | 1.8%    | 0.6%    |
|                | Coriobacteriaceae         | 0.0%           | 0.0%    | 0.0%    | 0.2%         | 0.3%    | 0.1%    |
| Bacteroidetes  | Bacteroidaceae            | 19.2%          | 1.0%    | 0.0%    | 45.3%        | 39.6%   | 43.8%   |
|                | Bacteroidales_S24-7_group | 0.0%           | 0.0%    | 0.0%    | 0.0%         | 0.2%    | 0.2%    |
|                | Porphyromonadaceae        | 0.0%           | 0.0%    | 0.0%    | 2.5%         | 1.4%    | 3.6%    |
|                | Prevotellaceae            | 0.0%           | 34.6%   | 27.8%   | 0.0%         | 8.1%    | 5.2%    |
|                | Rikenellaceae             | 0.0%           | 0.0%    | 0.0%    | 0.2%         | 0.2%    | 0.1%    |
| Firmicutes     | Acidaminococcaceae        | 1.8%           | 4.1%    | 5.4%    | 1.3%         | 1.8%    | 1.6%    |
|                | Christensenellaceae       | 0.0%           | 0.0%    | 0.0%    | 0.0%         | 0.0%    | 0.0%    |
|                | Clostridiaceae_1          | 0.1%           | 0.8%    | 1.7%    | 0.0%         | 0.0%    | 0.0%    |
|                | Erysipelotrichaceae       | 0.0%           | 0.0%    | 0.0%    | 0.0%         | 0.0%    | 0.0%    |
|                | Eubacteriaceae            | 0.0%           | 0.0%    | 0.0%    | 0.1%         | 0.3%    | 0.2%    |

|                        |                            |       |       |       |       |       |       |
|------------------------|----------------------------|-------|-------|-------|-------|-------|-------|
|                        | <i>Lachnospiraceae</i>     | 8.6%  | 1.9%  | 0.2%  | 19.7% | 18.3% | 15.4% |
|                        | <i>Ruminococcaceae</i>     | 0.0%  | 0.0%  | 0.0%  | 0.5%  | 0.5%  | 0.3%  |
|                        | <i>Veillonellaceae</i>     | 37.1% | 43.6% | 49.6% | 10.3% | 10.1% | 12.2% |
| <i>Lentisphaerae</i>   | <i>Victivallaceae</i>      | 0.0%  | 0.0%  | 0.0%  | 0.4%  | 0.3%  | 0.3%  |
|                        | <i>Alcaligenaceae</i>      | 0.0%  | 0.4%  | 0.0%  | 0.3%  | 0.2%  | 0.1%  |
|                        | <i>Campylobacteraceae</i>  | 0.1%  | 0.0%  | 0.0%  | 0.0%  | 0.0%  | 0.0%  |
|                        | <i>Desulfovibrionaceae</i> | 0.0%  | 0.0%  | 0.0%  | 0.7%  | 1.5%  | 2.4%  |
| <i>Proteobacteria</i>  | <i>Enterobacteriaceae</i>  | 6.5%  | 2.6%  | 4.7%  | 0.1%  | 0.1%  | 0.2%  |
|                        | <i>Pseudomonadaceae</i>    | 1.9%  | 8.2%  | 4.7%  | 4.2%  | 3.2%  | 5.2%  |
|                        | <i>Rhodospirillaceae</i>   | 0.0%  | 0.0%  | 0.0%  | 0.1%  | 0.2%  | 0.4%  |
|                        | <i>Xanthomonadaceae</i>    | 2.0%  | 0.8%  | 4.3%  | 0.1%  | 0.1%  | 0.3%  |
| <i>Synergistetes</i>   | <i>Synergistaceae</i>      | 0.0%  | 0.0%  | 0.0%  | 11.2% | 7.0%  | 7.4%  |
| <i>Verrucomicrobia</i> | <i>Verrucomicrobiaceae</i> | 0.0%  | 0.0%  | 0.0%  | 2.1%  | 4.7%  | 0.1%  |

**Table S2.** Microbial composition (families belonging to specific phyla) in the simulated mucus (as estimated via 16S rRNA gene profiling (%)) of the simulated proximal and distal colon of the triple-M-SHIME during the control period (Day 14) (n = 1).

| Phylum                 | Family                           | Proximal colon |         |         | Distal colon |         |         |
|------------------------|----------------------------------|----------------|---------|---------|--------------|---------|---------|
|                        |                                  | Donor 2        | Donor 3 | Donor 4 | Donor 2      | Donor 3 | Donor 4 |
| <i>Actinobacteria</i>  | <i>Bifidobacteriaceae</i>        | 43.2%          | 42.0%   | 60.4%   | 2.4%         | 6.9%    | 2.0%    |
|                        | <i>Coriobacteriaceae</i>         | 0.0%           | 0.3%    | 0.0%    | 0.6%         | 1.3%    | 0.6%    |
| <i>Bacteroidetes</i>   | <i>Bacteroidaceae</i>            | 6.3%           | 0.5%    | 0.0%    | 12.5%        | 21.2%   | 16.9%   |
|                        | <i>Bacteroidales_S24-7_group</i> | 0.0%           | 0.0%    | 0.0%    | 0.0%         | 1.0%    | 1.1%    |
|                        | <i>Porphyromonadaceae</i>        | 0.0%           | 0.0%    | 0.0%    | 1.5%         | 3.2%    | 2.0%    |
|                        | <i>Prevotellaceae</i>            | 0.0%           | 7.2%    | 3.1%    | 0.0%         | 0.4%    | 0.3%    |
|                        | <i>Rikenellaceae</i>             | 0.0%           | 0.0%    | 0.0%    | 1.7%         | 0.5%    | 1.6%    |
| <i>Firmicutes</i>      | <i>Acidaminococcaceae</i>        | 1.6%           | 16.7%   | 6.8%    | 0.9%         | 2.4%    | 2.1%    |
|                        | <i>Christensenellaceae</i>       | 0.0%           | 0.0%    | 0.0%    | 0.3%         | 0.1%    | 0.0%    |
|                        | <i>Clostridiaceae_1</i>          | 0.9%           | 0.5%    | 1.5%    | 0.9%         | 0.1%    | 1.2%    |
|                        | <i>Erysipelotrichaceae</i>       | 0.0%           | 0.0%    | 0.0%    | 0.3%         | 0.1%    | 0.2%    |
|                        | <i>Eubacteriaceae</i>            | 0.0%           | 0.0%    | 0.0%    | 2.5%         | 0.4%    | 1.0%    |
|                        | <i>Lachnospiraceae</i>           | 26.3%          | 4.9%    | 0.8%    | 33.3%        | 22.6%   | 37.2%   |
|                        | <i>Ruminococcaceae</i>           | 0.0%           | 0.0%    | 0.0%    | 3.2%         | 1.9%    | 3.2%    |
|                        | <i>Veillonellaceae</i>           | 15.8%          | 21.5%   | 23.9%   | 4.2%         | 5.4%    | 4.1%    |
| <i>Lentisphaerae</i>   | <i>Victivallaceae</i>            | 0.0%           | 0.0%    | 0.0%    | 0.6%         | 0.2%    | 0.3%    |
|                        | <i>Alcaligenaceae</i>            | 0.0%           | 1.7%    | 0.2%    | 0.4%         | 0.4%    | 0.2%    |
|                        | <i>Campylobacteraceae</i>        | 0.5%           | 0.0%    | 0.0%    | 0.0%         | 0.0%    | 0.0%    |
|                        | <i>Desulfovibrionaceae</i>       | 0.0%           | 0.0%    | 0.0%    | 2.1%         | 2.0%    | 2.5%    |
| <i>Proteobacteria</i>  | <i>Enterobacteriaceae</i>        | 4.2%           | 2.3%    | 1.7%    | 0.1%         | 0.1%    | 0.5%    |
|                        | <i>Pseudomonadaceae</i>          | 0.7%           | 2.2%    | 0.8%    | 0.0%         | 0.2%    | 0.1%    |
|                        | <i>Rhodospirillaceae</i>         | 0.0%           | 0.0%    | 0.0%    | 0.1%         | 0.2%    | 0.4%    |
|                        | <i>Xanthomonadaceae</i>          | 0.4%           | 0.1%    | 0.8%    | 0.0%         | 0.0%    | 0.1%    |
| <i>Synergistetes</i>   | <i>Synergistaceae</i>            | 0.0%           | 0.2%    | 0.0%    | 31.1%        | 28.3%   | 21.8%   |
| <i>Verrucomicrobia</i> | <i>Verrucomicrobiaceae</i>       | 0.0%           | 0.0%    | 0.0%    | 0.2%         | 0.5%    | 0.0%    |
